# Supplementary material
Source: publisher figshare collection journal article supplement (https://acs.figshare.com/ndownloader/files/4553122)
Supplement: Supplementary file 1 [file 4553122]

# Self-assembled mesoporous zirconia and sulfated zirconia nanoparticles synthesized by triblock copolymer as template

Swapan K. Das, Manas K. Bhunia, Anil K. Sinha and Asim Bhaumik

## Supporting materials

Calculation of particle size from XRD peak broadening

According to the Scherrer equation size of the crystallite,  $L_{hkl} = \frac{K\lambda}{\beta_{hkl} \cos \theta_{hkl}}$  Where;

$\beta$  is the full width of the peak at half maximum intensity of a specific phase (hkl) in radian.

K is a constant that varies with the method of taking the breadth ( $0.89 < K < 1$ )

$\lambda$  is the wavelength of incident x-rays.

$\theta$  is the centre angle of the peak.

L is the crystallite length.

From Figure 5,  $2\theta = 30.260^\circ$   $\theta = 15.130^\circ$   $\cos (15.130) = 0.96532$ ,  $\beta = 0.0202$

Here,

$2\theta = 30.260^\circ$ ,  $\theta = 15.130^\circ$ ,  $\lambda = 0.154$  nm,  $K = 0.9$

$\cos (15.130) = 0.9653$ ,  $\beta = 0.0202$

$L_{hkl} = 7.1$  nm
